RESEARCH ARTICLE

# Revisiting the Trivers-Willard theory on birth sex ratio bias: Role of paternal condition in a Malagasy primate

Martine Perret \*

UMR Mecadev 7179 CNRS-MNHN, Département Adaptations du Vivant, Brunoy, France

\* [martine.perret@mnhn.fr](mailto:martine.perret@mnhn.fr)

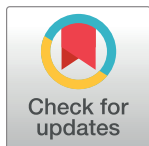

## Abstract

Within current theories on potential adaptive manipulation of offspring sex ratio, giving birth to a male or to a female is assumed to depend on the capacity of the mother to invest in offspring to maximize her fitness. The active role of the father in sex ratio bias at birth has been neglected until recently. The human sex ratio at birth is biased towards sons, although in occidental populations, the ratio has decreased regularly for 30 years and could be the consequence of the adverse effects of environmental chemicals on male hormones. In a Malagasy primate, the lesser mouse lemur, the potential effect of paternal testosterone levels on sex ratio bias at birth was tested on 130 litters (278 babies) produced in 52 mixed-sex groups. For each group, social dominance among males was characterized based on aggressive interactions and sexual behaviours. Using a multi correspondence analysis, high testosterone levels in grouped males, particularly those of the dominant male, were significantly correlated with more infants produced in male-biased litters, independent of the female condition. According to these results, predictions for sex ratio bias towards one sex or the other in mouse lemurs were discussed considering the influence of both parents.

## OPEN ACCESS

**Citation:** Perret M (2018) Revisiting the Trivers-Willard theory on birth sex ratio bias: Role of paternal condition in a Malagasy primate. PLoS ONE 13(12): e0209640. <https://doi.org/10.1371/journal.pone.0209640>

**Editor:** Cheryl S. Rosenfeld, University of Missouri Columbia, UNITED STATES

**Received:** October 4, 2017

**Accepted:** December 10, 2018

**Published:** December 21, 2018

**Copyright:** © 2018 Martine Perret. This is an open access article distributed under the terms of the [Creative Commons Attribution License](https://creativecommons.org/licenses/by/4.0/), which permits unrestricted use, distribution, and reproduction in any medium, provided the original author and source are credited.

**Data Availability Statement:** All relevant data are within the manuscript and its Supporting Information file.

**Funding:** UMR CNRS-MNHN 7179 supported this study. The funders had no role in study design, data collection and analysis, decision to publish, or preparation of the manuscript.

**Competing interests:** The author has declared that no competing interests exist.

## Introduction

As a key for life history strategies, parental ability to control the sex of the offspring should provide an evolutionary advantage and therefore, has been studied in a variety of taxa. The Trivers-Willard theory (TW) [1] predicts that the sex ratio of offspring (SR, male births/total births) should vary with the capacity of the mother to invest in her offspring to maximize her lifetime reproductive success. Besides the TW theory, an alternative hypothesis proposes that competition for local resource (LRC) which acts on individuals within groups may shape birth sex ratios of individuals based on their condition [2,3]. More, the theoretical scenario developed by Leinar [4] suggests that high quality females should produce the sex whose reproductive success is mostly influenced by maternal investment, when taking into account the lifetime reproductive values of sons or daughters. Other models stressed the role of sex-specific demography in sex ratio bias [5–8]. Thus, theoretical or empirical studies suggest that, the sex ratio biases are the result of facultative response of individuals depending on

environmental constraints. However, whatever the model, the relationship between maternal quality, generally assessed by the social dominance, and offspring sex ratio remains the studied cue, the influence of the father's quality being unknown or considered as negligible. Thus, despite several analyses on birth sex ratios among primate's populations, including humans [9–13], no consistent pattern emerges from predictions and observations, suggesting more complex mechanisms for potential adaptive manipulation of offspring sex ratios. Primarily based only on the maternal condition, in the absence of the exact role of paternal conditions, our understanding of the selective forces affecting birth sex ratio is very restricted. However, high paternal concentrations of testosterone around the time of conception are suspected to skew offspring sex ratios towards sons [14, 15]. Understanding of the paternal role in sex ratio bias has come from indirect evidence. In the red deer, a positive correlation has been found between male fertility assessed by the percentage of normal spermatozoa and the production of sons [16]. In Human, the sex ratio at birth, normally biased towards males, has been in constant decline in industrialized countries over recent decades [17, 18]. Simultaneously, explorations on causes for the decline have stressed the widespread decrease in semen quality (motility, concentration, ratio of Y:X spermatozooids) in industrialized countries [19, 20], suggesting that the significant overall decline in male births could be linked to a negative effect of environmental factors on male reproductive function. Supporting this hypothesis, stress from multiple origins is correlated with a low sex ratio, including an earthquake [21], the Slovenian war [22], industrial pollution [23], socioeconomic conditions [24–27], and terrorist attacks [28]. Recently, environmental endocrine-disrupting chemicals, for example, perfluoroalkyl substances (PFAS), bisphenol (BPA) and pesticides, have been shown to affect parental hormones and the secondary sex ratio through changes in sperm morphology and motility [29–31]. When both parents are exposed to PFAS, BPA or other chemical substances, an excess of female births is observed that is significantly linked to only paternal chemical concentrations [32–34]. Thus, endocrine-disrupting chemicals have clear anti-androgenic activities, as demonstrated in most animal studies [35–37] and in adult humans [38–40]. However, to determine whether the alterations of human sperm are correlated with low fertility and low sex ratio at birth, a direct relationship remains to be established between sperm quality and testosterone levels and a decrease in birth sex ratio [31, 34, 41].

The low fecundity of most primates is one difficulty in elucidating the role of the father condition in sex ratio bias. By contrast, the reproductive patterns and high fecundity of the grey mouse lemur, a small Malagasy primate (*Microcebus murinus*), offer several practical advantages for experimentally testing the bias of sex ratio at birth. Reproduction is highly seasonal with females exhibiting marked oestrous synchrony at the beginning of the reproductive season. Females give birth to 1–3 young per litter, exceptionally 4, after a gestation period lasting approximately 2 months. With regards to males, field studies and captive observations revealed that the mating system is mainly based on polygynous-polyandrous strategies with male guarding behaviour and female choice [42–45]. A male-biased sex ratio at birth is observed in captive mouse lemur females (51.3% from more than 2300 births). Skewed sex ratios were previously demonstrated to occur at a conception level, with the ratios independent of the female nutritional state or litter size [46]; however, birth sex ratios are dependent on social interactions among females during the follicular phase [47] through changes in oestrogen levels before oestrus [48]. When maintained in large uni-sex groups before mating, females overproduced sons, whereas isolated females presented the inverse tendency. When kept in a heterosexual group before mating, the sex ratio at birth remains slightly male-biased.

However, these results were obtained without considering the potential role of the father in the direction of the sex ratio bias. Using genetic paternity analysis in wild animals, heavy males with high competitive abilities sire more offspring [42, 43]. In captivity, a high sexual

competition for prior access to oestrous females develops among males, leading to the emergence of a dominant male who fathers almost all the offspring produced [49, 50]. Thus, the aim of this study was to examine the relationship between characteristics of males immediately before mating within a group (dominance, body mass, age and testosterone level) and litter production in terms of number and sex of newborns. Then, a model based on both male and female hormonal conditions was proposed for the direction of sex ratio at birth in this primate.

## Materials and methods

### Animals

The experiments covered a period of seven years, and all mouse lemurs used in this study (156 males and 156 females) were born in the breeding colony established at Brunoy (France, IBISA platform, agreement E91.114.1, DDPP Essonne) from a stock originally caught near the southern coast of Madagascar fifty years ago. Captive conditions were maintained constant with respect to ambient temperature (24–26°C) and hygrometry (55–60%). Animals were fed *ad libitum* on a standardized diet, including fresh fruits, a homemade mixture and mealworms. To ensure seasonal reproductive rhythms, animals were routinely exposed to an artificial photoperiodic cycle consisting of 6 months of summer-like photoperiod (14 h of light/day) followed by 6 months of winter-like photoperiod (10 h of light/day). The beginning of the breeding season was induced by the exposure to long days [51].

### Experimental design

Except during the experiments, males and females were kept in single sex groups of 2–3 animals per cage. At the beginning of the breeding season induced by the long days, groups of 3 males and 3 females each were constituted and kept in cages (180x150x120 cm) with many wooden supports and several nest boxes. Both males and females were weighed before the observation period and were chosen so that individuals within a group were not closely related (first-order relatedness such as parentage of full sib ship). Within a group, males and females were of a similar body mass (average difference  $9.5 \pm 3$  g) and age (average difference  $0.2 \pm 0.1$  year). All oestrus occurred synchronously within a 10-day period, and individual behaviours (agonistic and sexual interaction) within each group were video recorded using an infrared camera (MediaZoomIR1; AXOS, France) during the first 6 hours of nocturnal activity [49, 44, 52]. Genetic determinations of paternity demonstrate a highly robust relationship between the rank of a male and its reproductive success [49]. Consequently, a male dominance index was calculated based on the outcomes of aggressive interactions won (w) or lost (l) during the total observation period using the formula  $(w-l) / (w+l)$ . In each group, males were ranked according to the decreasing value of the dominance index from +1 for a male whose agonistic interactions were always successful ( $\alpha$ ) to -1 for a male that never initiated fights and was always chased by the two other males ( $\gamma$ ). This dominance index [49, 50] that assesses a rank for each male in a group allows the comparison of animals living in different social groups. For females, no clear social rank could be detected because of the very low agonistic interactions between them during the short mating period.

For males, immediately before the observation period, a blood sample (100  $\mu$ l) was drawn via the saphenous vein without anaesthesia 4 h before night. The sample was immediately centrifuged and stored at -20°C until assayed. Plasmatic testosterone was measured in duplicate using an ELISA immunoassay (RE52041; IBL, Hamburg, Germany), using a method previously described [53]. The mean intra-assay coefficient of variation was 4.9%, and the mean inter-assay coefficient of variation was 3.7%.

After the occurrence of oestrus, females were withdrawn from the group, isolated and checked for gestation 3 weeks later. At birth, size and sex ratio of the litter were recorded. According to the sex of each newborn produced (M = male, F = female; visually distinct from birth), the type of the litter was defined as well balanced for MF, MMFF litters, male-biased for M, MM, MMF and MMM litters and female-biased for F, FF, FFM and FFF litters.

### Statistical analyses

Data are presented as the mean  $\pm$  SEM. For each group, means of body mass and age for both males and females were calculated. Additionally, mean testosterone levels per group, mean female parity and the total number of offspring produced by group were analysed. Statistical analyses included multi-way analysis of variance or analysis of covariance with body mass or age. Non-parametric tests for mean difference according to the normality of the data and linear correlations between parameters were also used. Between-group variation with respect to age, body mass in both males and females, testosterone value, dominance rank, and number and sex of offspring produced was analysed using a centred-scaled principal component analysis (N = 52 groups) computed in R using the 'FactorminR' 1.28 package. For statistical analysis of sex ratios, we compared the proportions of litters in which infants in one sex predominated (male-biased or female-biased), irrespective of the litter size, with those of well-balanced litters.

### Ethics statement

We adhered to the Guidelines for the Treatment of Animals in Behavioural Research and Teaching [54] and the legal requirements of the country (France) in which the work was conducted. All the results in this study did not correspond to experimental procedures but are issued from the exploitation of the reproductive data collected in the long-term mouse lemur's captive population maintained for scientific purposes. This colony is established under the authorisation of the *Direction Départementale de Protection des Populations* (DDPP/022-E91-114-1) and is affiliated to the Ethical Comity Cuvier (C2EA 68). All procedures to breed mouse lemurs are conducted in accordance with the European Communities Council Directive (86/609/EEC) and are performed by authorized animal breeders delivered by the Departmental Veterinary Services (Directive 2010/63/UE—Capacity certificate *Préfecture de l'Essonne*, 04/03/1995). Specifically for reproduction, housing conditions enable the animals to express their entire locomotion and sexual repertoire. Several nest-boxes are provided so that animals could escape agonistic interactions from conspecifics, and a chase or a fight immediately stops when the chased animal enters a nest-box. None of the animals used in this study was injured, and in the colony, heterosexual groups were restricted in time to the few days of female oestrus. Lastly, no anaesthesia, euthanasia or animal sacrifice is part of this study.

## Results

### Reproductive parameters of males

Body mass and age of the 156 studied males were on average  $90 \pm 2$  g and  $2.5 \pm 0.1$  years, respectively. For all males, significant correlations were observed between body mass, testosterone levels, age and the dominance index (Table 1). Dominance status were positively linked to testosterone levels ( $F_{1/151} = 48.4$ ,  $P < 0.001$ —Fig 1), but not to age ( $P = 0.36$ ) nor to body mass ( $P = 0.08$ ) without interactions between variables ( $P = 0.35$ ). Within each group, independently of body mass and age, dominant males exhibited higher testosterone levels ( $64.5 \pm 1.8$  ng/ml) compared to subordinate males ( $42.4 \pm 1.6$  ng/ml,  $F_{1/154} = 71.6$ ,  $P < 0.001$ ).

**Table 1. Characteristics of the 156 studied males with correlation between parameters.**

|                 | $\mu \pm \text{sem}$ | Body mass               | Testosterone               | Age                     |
|-----------------|----------------------|-------------------------|----------------------------|-------------------------|
| Body mass (g)   | 90 $\pm$ 2.4         |                         |                            |                         |
| Testosterone    | 49.5 $\pm$ 1.3       | 0.2437 <b>P = 0.002</b> |                            |                         |
| Age (years)     | 2.44 $\pm$ 0.1       | 0.1338 <b>P = 0.08</b>  | 0.0742 <b>P = 0.36</b>     |                         |
| Dominance Index | -0.02 $\pm$ 0.06     | 0.2565 <b>P = 0.001</b> | 0.6667 <b>P &lt; 0.001</b> | 0.1682 <b>P = 0.036</b> |

<https://doi.org/10.1371/journal.pone.0209640.t001>

### Reproductive parameters of females

Body mass and age of the 156 studied females were on average 99  $\pm$  1.5 g and 2.7  $\pm$  0.1 years, with no significant correlation between age and body mass ( $r = 0.0842$ ,  $P = 0.29$ ). Fifty-three females were primiparous, whereas the others had 1 to 4 successful pregnancies before the experiment. Within the grouped females, 26 females did not enter pregnancy, mainly multiparous females (23%). A multivariate analysis demonstrated that the female reproductive success was not influenced by body mass ( $P = 0.76$ ), by age ( $P = 0.15$ ) or by parity ( $P = 0.14$ ) with no interactions between these parameters ( $P = 0.14$ ).

One hundred thirty litters were produced with a general male-biased sex ratio at birth of 56.5% (157 males/121 females), significantly different from 50% ( $X^2 = 4.66$ ,  $P < 0.05$ ). On average, females gave birth to 2.1  $\pm$  0.05 babies per litter (range 1 to 3, exceptionally one litter of 4). The size of the litters followed the usual pattern observed for mouse lemurs, i.e., with almost 50% of litters with 2 babies (69/130), and this distribution did not differ according to parity ( $F_{1/126} = 0.04$ ,  $P = 0.85$ ), body mass ( $F_{1/126} = 0.94$ ,  $P = 0.15$ ) or age ( $F_{1/126} = 2.09$ ,  $P = 0.40$ ), although the primiparous females were significantly younger than the multiparous females ( $F_{1/128} = 58.3$ ,  $P < 0.001$ ). The type of the litters (F, FF, FFF, MF, M, MM, MMM, MMF, MFF, MMFF) was statistically independent of body mass ( $F_{9/120} = 0.834$ ,  $P = 0.58$ ), parity ( $F_{9/120} = 0.52$ ,  $P = 0.79$ ) or age ( $F_{9/120} = 0.89$ ,  $P = 0.52$ ).

When considering the bias in litters, male-biased, female-biased or well balanced, a deficit in female-biased litters was observed ( $X_2 = 28.7$ ,  $df 1$ ,  $P < 0.001$ ) that was independent of

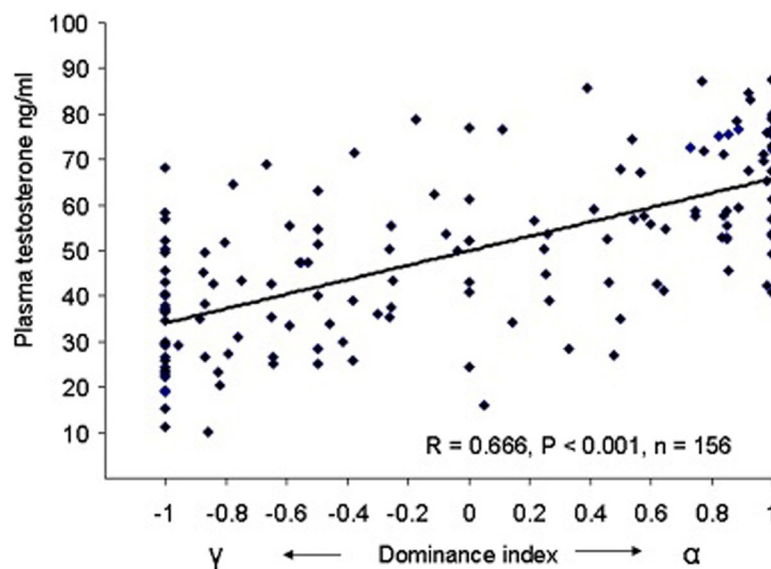

**Fig 1. Relationship between plasma testosterone levels and dominance index based on aggressive interactions between males within each group.**

<https://doi.org/10.1371/journal.pone.0209640.g001>

female parity ( $F_{2/127} = 1.01, P = 0.36$ ), body mass ( $F_{2/127} = 0.42, P = 0.665$ ) or age ( $F_{2/127} = 1.36, P = 0.26$ ). The general male-biased sex ratio within females appeared primarily because of a significant deficit of litters with 2 female babies ( $X^2 = 28.7 \text{ df } 2, P < 0.001$ ), regardless of female parity, body mass or age. Thus, the number and the sex of the infants produced per female did not significantly correlate with body condition (Table 2).

### Characteristics of sex-mixed groups and offspring sex ratio

Before testing the possible relationship between testosterone levels in males and sex ratio bias at birth, the homogeneity of the different parameters (body mass, age, reproductive success) within the 52 groups was tested according to the type of the offspring sex ratio produced by each group. The infants produced by each of the 52 groups were distributed as well balanced ( $N = 8, 18\text{M}-18\text{F}$ ), female-biased ( $N = 16, 22\text{M}-61\text{F}$ ) and male-biased ( $N = 28, 115\text{M}-44\text{F}$ ). This distribution differed from that of the theoretical one ( $X_2 = 4.06, P < 0.01$ ), corresponding to a clear deficit in female-biased production. Because of the choice of sexual partners in the experimental design, no significant difference was observed for any parameter representative of body condition for both males and females (Table 3). However, male-biased sex ratio was correlated with testosterone levels recorded in the dominant male ( $F_{2/49} = 14.3, P < 0.001; r = 0.6342, N = 52, P < 0.001$ ), but not with mean of testosterone levels in subordinate males ( $F_{2/49} = 0.83, P = 0.439; r = 0.211, N = 52, P = 0.13$ ). Lastly, no significant relationship was observed between testosterone levels of males and the number of non-successful females within a group ( $P = 0.10$ ).

Principal component analysis was performed on the 52 groups with the type of the litter (E, F and M) as the qualitative variable and as quantitative variables: body mass and age of sexual partners, female parity, testosterone level of dominant male, testosterone level of subordinate males, the sex ratio and the total number offspring produced per group. The first two principal components of the variable map (Fig 2A) explained 43% of the total variation in birth sex ratio determination. The first axis (Dim 1, 26.3%) mainly received positive loadings (near 70%) from female age and parity (linked together). The second axis (Dim 2) accounted for 16.5% and primarily received positive and similar loadings (near 60%) for litter sex ratio and testosterone levels of dominant males. Both axes received weak and comparable loadings (less than 20%) from body mass of females, age of males, testosterone levels of subordinate males and the number of babies produced. Finally, PCA confirmed that male-biased litters are primarily linked to testosterone levels of dominant males, independently of parents' body condition or age.

The group factor map (Fig 2B) showed the repartition of groups according to the litter type they produced. The Dim 1 axis received positive loadings (60%) from groups producing female-biased litters, clearly opposed to groups producing male-biased litters. Well-balanced litters remained intermediate. The discrimination might have been better with more

**Table 2. Characteristics of the studied females (means ± SEM).** Significant differences between primiparous and multiparous females are indicated.

|                     | Non pregnant | Primiparous           | Multiparous           |
|---------------------|--------------|-----------------------|-----------------------|
| N                   | 26           | 55                    | 75                    |
| Body mass (g)       | 95 ± 3       | 97 ± 3                | 102 ± 2 p = 0.11      |
| Age (year)          | 2.9 ± 0.2    | 1.7 ± 0.1             | 3.3 ± 0.1 P < 0.01    |
| Parity              | 2.2 ± 0.1    | 1                     | 2.7 ± 0.07 P = 0.95   |
| Nb babies / litter  |              | 2.13 ± 0.1            | 2.12 ± 0.07 P = 0.95  |
| Sex ratio (% males) |              | 53.0                  | 59.0                  |
| Production          |              | 62 males / 55 females | 95 males / 66 females |

<https://doi.org/10.1371/journal.pone.0209640.t002>

**Table 3. Mean ± SEM per group of sexual partners' characteristics according to the type of litters:—male biased (M),—well balanced (E) and,—female-biased (F).** The only one significant difference was underlined in bold.

| Mean ± SEM per group                  | M               | E                 | F                 | P value             |
|---------------------------------------|-----------------|-------------------|-------------------|---------------------|
| N                                     | 28              | 8                 | 16                |                     |
| SexRatio %                            | <b>76.3 ± 3</b> | <b>50</b>         | <b>21.7 ± 3.9</b> |                     |
| Body mass Males(g)                    | 91 ± 3          | 99 ± 8.3          | 84 ± 4.5          | P = 0.11            |
| Body mass Females (g)                 | 98 ± 3          | 103 ± 6           | 100 ± 4           | P = 0.61            |
| Males age (year)                      | 2.3 ± 0.2       | 2.7 ± 0.3         | 2.6 ± 0.2         | P = 0.30            |
| Females age (year)                    | 2.6 ± 0.2       | 2.8 ± 0.4         | 2.7 ± 0.2         | P = 0.73            |
| % success mating                      | 90.5 ± 4.2      | 85.5 ± 8          | 74 ± 7            | P = 0.09            |
| Parity                                | 1.95 ± 0.1      | 2.4 ± 0.2         | 2.06 ± 0.1        | P = 0.09            |
| Total offspring produced              | 5.7 ± 0.4       | 4.5 ± 0.7         | 5.3 ± 0.8         | P = 0.49            |
| Number of young / Female              | 2.1 ± 0.08      | 2.0               | 2.3 ± 0.2         | P = 0.42            |
| Testosterone subordinate males(ng/ml) | 44.9 ± 2.3      | 44.5 ± 4.2        | 43.6 ± 1.9        | P = 0.44            |
| Body mass dominant males (g)          | 96 ± 4          | 107 ± 10          | 87 ± 6            | P = 0.148           |
| Age dominant males (year)             | 2.5 ± 0.2       | 2.8 ± 0.4         | 2.9 ± 0.3         | P = 0.46            |
| Testosterone dominant males (ng/ml)   | <b>71.3 ± 2</b> | <b>60.2 ± 4.2</b> | <b>53.3 ± 2.7</b> | <b>P &lt; 0.001</b> |

<https://doi.org/10.1371/journal.pone.0209640.t003>

numerous well-balanced litters; however, a PCA without integrating the well-balanced litters produced the same results.

Lastly, a slight but significant correlation ( $r = 0.2795$ ,  $P = 0.044$ ) was detected between mean testosterone levels in a group and the number of babies produced. When mean

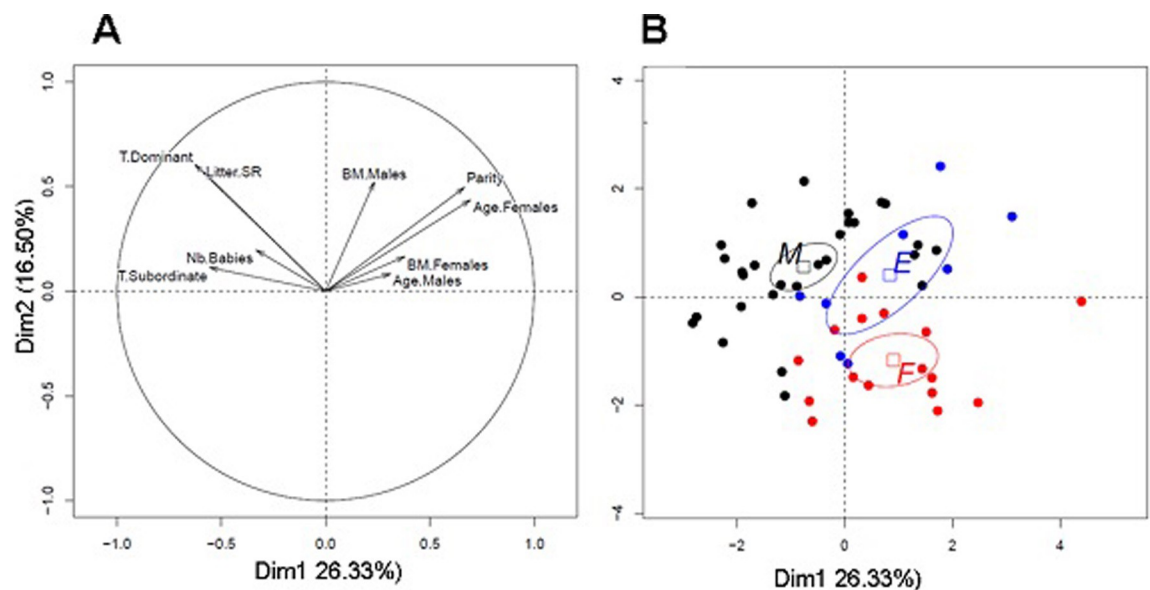

**Fig 2. Principal component analysis.** (A)—Variable factor map on the 52 tested groups with quantitative variables:—body mass (BM) and age of both males and females,—parity,—testosterone levels (T) for the dominant male and the subordinate males in each group, -litter sex ratio and number of babies produced. Variables are represented by their scores on Dim1 (x-axis) and Dim2 (y-axis). The X and Y axis represent principal component loadings on Dim1 and Dim2 respectively, which corresponded to the weights of each original variable graphically visualized by arrows. Dim1 (26.3%) represents the influence of parents' body condition on the litters data among which the parity and age of the grouped females were the primary affecting factor. Dim2 (16.5%) shows the strong relationship between testosterone levels of the dominant male and offspring production biased towards males. (B)—Group factor map on the 52 tested groups with litter types as qualitative variable. PCA clearly separates groups producing male-biased litters (M, black) from groups producing female-biased litters (F, red circles). Well-balanced litters appeared intermediate (E, blue).

<https://doi.org/10.1371/journal.pone.0209640.g002>

testosterone levels of males in a given group were high, the sexual competition seemed stronger accounting for more numerous infants born in male-biased litters.

## Discussion

Mouse lemurs are a promiscuous and monomorphic primate species. In the wild, females share their home range with their daughters, whereas males disperse [55]. According to the Local Resource Competition theory of sex allocation, an increase in competition between philopatric females for local resources and mates should favour a skewed sex ratio at birth towards males [2, 4, 56]. Experimental studies demonstrate that the social context in which females live before mating plays a major role in determining offspring sex ratio. Isolated females produce more daughters; unisex-grouped females produce more sons; whereas sex-mixed grouped females gave birth to a near equilibrated sex ratio, with these differences occurring at a conception level without sex-selective abortions [46]. Differences have been linked to changes in hormonal conditions of females before conception, mediated by urinary olfactory cues [47, 48]. In this study, to avoid differences in female status, the role of male condition was tested with females kept in the same social conditions, i.e., brief sex-mixed groups. Such conditions are known to limit potential social stress effects on female reproductive capacity [46]. Moreover, analyses revealed that the success of pregnancy and the number of babies born per female were independent of body condition or parity of females in all groups. This result provided confidence that differences observed in sex ratio biases among groups were primarily dependent on the male condition.

With regards to mouse lemur's males, field studies on mating strategies have long suggested the importance of scramble competition among males and pronounced sperm competition [42, 43, 57]. Later, direct observations of mating behaviour revealed the neglected role of male guarding behaviours and that of female choice [43–45]. In captivity, the potential for a male to monopolize mating is relatively high and sexual competition through fights and pheromonal inhibition of rivals leads to a clear hierarchy within grouped males [50, 58]. Usually only the dominant males mate females, because females preferentially accept copulations from dominant and aggressive males [44, 45, 49]. Although all babies born in this study cannot be assumed unique descendants from the dominant male in each group, previous genetic paternity assessments reveal that 93% of babies issued from a group were fathered by the dominant male [50, 58]. In the wild, local competition for oestrous females leads to a transient hierarchy among males [59], and the dominant male obtains priority access to females ensuring his reproductive fitness will increase, as observed in many gregarious primates (review [60]). Based on the relationship in this study between mean testosterone level of males in a group (particularly that of the only dominant male) and the sex ratio of newborns produced, an effect of male hormonal condition was strongly suggested. This hypothesis is consistent with previous studies suggesting that siring a male offspring is linked to father reproductive quality estimated by sperm quality [16] or in fertility treatments known to increase testosterone levels [13]. Lastly, high testosterone levels of males within a group led to a significant increase in the number of newborns produced, potentially linked to the stimulating effects of testosterone-dependent pheromones on ovulation rate in mouse lemur females.

In several studies, whether the variations in sex ratio bias between species or within species were consistent with current theories likely depended on environmental conditions, particularly resource availability. In captive mouse lemurs, access to food is not limited, and therefore, the skewed sex ratios observed for one or the other sex primarily depended on parental interactions. Considering that maternal and paternal hormonal conditions might have additive effects in determining offspring sex ratio, a schematic model was constructed to predict the



direction of the bias in sex ratio at birth in this primate (Fig 3). Because body mass of parents was apparently not a predicting factor for the skewed sex ratios ([46], and this study), we focused on sexual hormones.

Depending both on the environmental context (resources, population density, social interactions) and intrinsic factors (age, health), hormonal conditions of parents before conception may be high or low, and as a first consequence, success of mating behaviour will be potentially affected. Indeed, females prefer males with high aggressive potential (i.e., high testosterone levels); whereas males prefer females with high oestrogen levels [44]. Then, reproductive success will be high when both parents are in good hormonal condition and most likely low, even absent, when parents are in poor hormonal condition. Females with high oestrogen levels will be highly attractive and will choose the most competitive male (local dominance) among the males in competition. These females will produce numerous babies, and the offspring sex ratio will be skewed to one sex or the other depending on the male hormonal condition: bias towards males with a good father or towards females when mated with a less suitable father. By contrast, females with low oestrogen levels will be less attractive and when mated, will give birth to few offspring with a male-biased sex ratio. Such model taking into account father quality, even without paternal care, may explain the bias of sex ratio towards one sex or another for high quality females, independently of the context. Lastly, the litter type can affect the growth and survival of infants, suggesting a potential effect on the future reproductive fitness of offspring produced (Fig 3).

However, limiting explanations for offspring sex ratio bias to only hormonal status of both parents could lead to misinterpretation. In various species, the condition of parents has been assessed based on only the dominance rank or on some morphological/physiological characteristic, although many other factors are involved. Nevertheless, because the condition of parents around conception has unanimous support for determining a conceptual sex bias, studies are focused on the female physiological state around conception. In addition to the effects of nutrition, other factors have been examined for their influence, such as maternal androgens or glucose levels before conception [13, 61–66].

Lastly, one of the primary questions from an evolutionary perspective concerns the potential fitness benefit for parents to produce one sex or the other [5, 6, 60]. Because paternal care

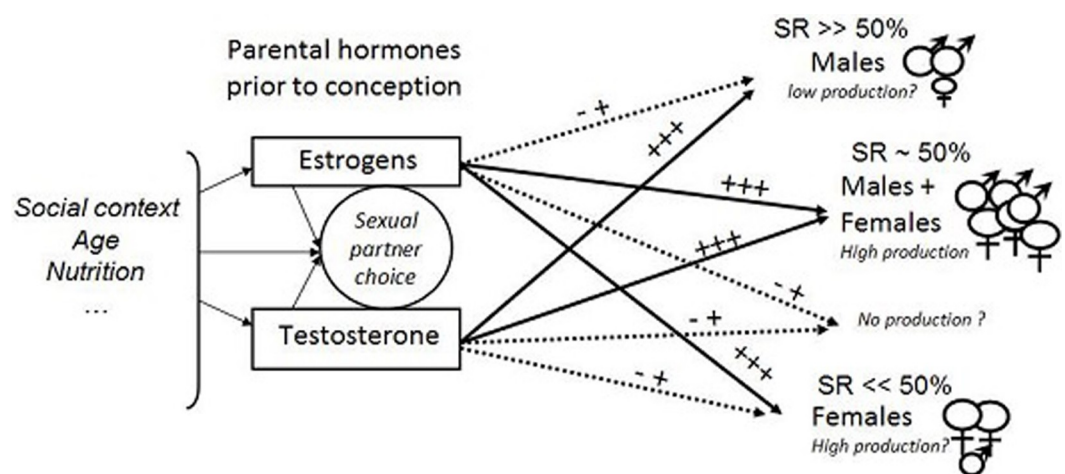

**Fig 3. –Predictions on the direction of sex ratio (SR) bias et potential production in mouse lemurs.** According to the level of parents’ sexual hormones prior to conception (+++ good or +- low), the future reproductive fitness of offspring ♀ and ♂ might be low (small symbol) or good (large symbol) depending on the sex ratio of the litter.

<https://doi.org/10.1371/journal.pone.0209640.g003>

does not occur in mouse lemurs, the reproductive value of the offspring is mostly influenced by mother quality and environment during early life. For example, litter sex composition in marmots affects life history traits and future dominance status [67, 68]. Preliminary results with captive mouse lemurs show that the reproductive value of male or female offspring varies according to the litter composition (unpublished data). High yearly turnover rates for both sexes are observed in wild populations of mouse lemurs with only 7% of females and 14% of males remaining alive at the onset of the third breeding season [69]. As a consequence, manipulation of sex ratio at birth and maternal investment might have important effects on the fitness benefit of parents in this species. Therefore, to assess the adaptive manipulation of offspring sex ratios by parents to maximize their fitness, further studies should be conducted on sex ratio bias in which the reproductive value is assessed during the lifetime of offspring.

## Supporting information

**S1 File.** The data set used in this study is available in the file “data proceedings–MS17-34926R2. (XLS)

## Acknowledgments

We gratefully thank Isabelle Hardy for her assistance on the “mouse lemurs’ life history traits” database and Jérémy Terrien for help with statistical analyses. We thank also Lauriane Dezaire and Sandrine Gondor for care of the animals.

## Author Contributions

**Conceptualization:** Martine Perret.

**Data curation:** Martine Perret.

**Formal analysis:** Martine Perret.

**Writing – original draft:** Martine Perret.

**Writing – review & editing:** Martine Perret.

## References

1. Trivers RL, Willard DE. Natural selection and the ability to vary the sex ratio of offspring. *Science* 1973; 191: 243–263. <https://doi.org/10.1126/science.179.4068.90>
2. Van Schaik CP, Hdry SB. Intensity of local resource competition shapes the relationship between maternal rank and sex ratios at birth in cercopithecine primates. *Am Nat.* 1991; 155:1555–1562.
3. Silk JB. Local resource competition and facultative adjustment of sex ratios in relation to competitive abilities. *Am Nat.* 1983; 121(1): 56–66.
4. Leimar O. Life-history analysis of the Trivers and Willard sex-ratio problem. *Behav Ecol.* 1996; 7(3): 316–325. <https://doi.org/10.1093/beheco/7.3.316>
5. Johnson CN. Dispersal and the sex ratio at birth in primates. *Nature* 1988; 332: 726–728. <https://doi.org/10.1038/332726a0> PMID: 3357538
6. Brown GL, Silk JB. Reconsidering the null hypothesis: is maternal rank associated with birth sex ratios in primate groups. *PNAS* 2002; 99:11252–11255. <https://doi.org/10.1073/pnas.162360599> PMID: 12177424
7. Schindler S, Gaillard JM, Grüning A, Neuhaus P, Traill LW, Tuljapurkar D et al. Sex-specific demography and generalization of the Trivers-Willard theory. *Nature* 2015; 526 (7572): 249–252. <https://doi.org/10.1038/nature14968> PMID: 26390152
8. Schino G. Birth sex ratio and social rank: consistency and variability within and between primate groups. *Behav Ecol.* 2004; 15(5): 850–856. <https://doi.org/10.1093/beheco/arl094>
9. Clutton-Brock TH, Iason GR. Sex ratio variation in mammals. *Quarterly Rev Biol.* 1986; 61(3): 339–374.

10. Hiraiwa-Hasegawa M. Skewed birth sex ratios in primates: should high-ranking mothers have daughters or sons? *Trends Ecol Evol.* 1993; 8(11): 395–400. [https://doi.org/10.1016/0169-5347\(93\)90040-V](https://doi.org/10.1016/0169-5347(93)90040-V) PMID: 21236210
11. Packer C, Collins DA, Eberly LE. Problems with primate sex ratios. *Philos Trans R Soc. London* 2000; 355(1403): 1627–1635. <https://doi.org/10.1098/rstb.2000.0.725>
12. Brown GR. Sex-biased investment in non-human primates: can Trivers & Willard's theory be tested. *Anim Behav.* 2001; 61: 683–694. <https://doi.org/10.1016/anbe.2000.1659>
13. James WH. Evolution and the variation of mammalian sex ratios at birth: reflections on Trivers and Willard 1973. *J Theor Biol.* 2013; 334: 41–148. <https://doi.org/10.1016/j.jtbi.2013.06.023> PMID: 23810932
14. James WH. Evidence that mammalian sex ratios at birth are partially controlled by parental hormonal level around the time of conception. *J Endocrinol.* 2008; 198: 3–15. <https://doi.org/10.1677/JOE-07-0446> PMID: 18577567
15. James WH. The categories of evidence relating to the hypothesis that mammalian sex ratios at birth are casually related to the hormone concentrations of both parents around the time of conception. *J Biosoc Sci.* 2011; 43: 167–184. <https://doi.org/10.1017/S0021932010000660> PMID: 21205375
16. Gomendio M, Malo AF, Soler AJ, Fernandez-Santos MR, Esteso MC, Garcia AJ et al. Male fertility and sex ratio at birth in red deer. *Science* 2006; 314: 1445–1447. <https://doi.org/10.1126/science.1133064> PMID: 17138900
17. Parazzini F, La Vecchia C, Levi F, Franceschi S. Trends in male:female ratio among newborn infants in 29 countries from five continents. *Hum Reprod.* 1988; 113: 1394–1396. <https://doi.org/10.1093/humrep/13.5.1394>
18. Grech V, Vassallo-Agius P, Savona-Ventura C. Secular trends in sex ratios at birth in North America and Europe over the second half of the 20th century. *J Epidemiol. Com Health* 2003; 57(8): 612–615. <https://doi.org/10.1136/jech.57.8.612> PMID: 12883068
19. Jørgensen N, Joensen UN, Jensen TK, Jensen MB, Almstrup K, Olesen IN, et al. Human semen quality in the new millennium: a prospective cross-sectional population-based study of 4867 men. *BMJ Open* 2012; 2:e000990. <https://doi.org/10.1136/bmjopen-2012-000990> PMID: 22761286
20. Rolland M, Le Moal J, Wagner V, Royère D, De Mouzon J. Decline in semen concentration and morphology in a sample of 26 609 men close to general population between 1989 and 2005 in France. *Hum Reprod.* 2013; 28(2): 462–470. <https://doi.org/10.1093/humrep/des415> PMID: 23213178
21. Fukuda M, Fukuda K, Shimizu T, Moller H. Decline in sex ratio at birth after Kobe earthquake. *Hum Reprod.* 1998; 13: 2321–2322. <https://doi.org/10.1093/humrep/13.8.2321> PMID: 9756319
22. Zorn B, Sücür V, Stare J, Meden-Vrtovec H. Decline in sex ratio at birth after 10-day war in Slovenia. *Hum Reprod.* 2002; 17 (12): 3173–3177. <https://doi.org/10.1093/humrep/17.12.3173> PMID: 12456620
23. Figà-Talamanca I, Tarquini M, Lauria L. Is it possible to use sex ratio at birth as indicator of the presence of endocrine disrupters in environmental pollution? *G Ital Med Lav Ergon.* 2003; 25, (Suppl. 3): 52–53.
24. Catalano RA. Sex ratios in the two Germanies: a test of the economic stress hypothesis. *Hum Reprod.* 2003; 18(9): 1972–1975. <https://doi.org/10.1093/humrep/del283> PMID: 12923159
25. Kanninen O, Karhula A. Change in Income at a macro level predicts sex ratio at birth in OCDE countries. *PLoS One* 2016; 11(7): e0158943. <https://doi.org/10.1371/journal.pone.0158943> PMID: 27437701
26. Cameron EZ, Dalerum F. A Trivers-Willard effect in contemporary humans: Male-biased sex ratios among billionaires. *PLoS One* 2009; 4(1): e4195. <https://doi.org/10.1371/journal.pone.0004195> PMID: 19142225
27. Schnettler S. Revisiting a sample of US billionaires: how sample selection and timing of maternal condition influence findings on the Trivers-Willard effect. *PLoS One* 2013; 8(2): e57446. <https://doi.org/10.1371/journal.pone.0057446> PMID: 23437389
28. Catalano R., Bruckner T., Marks A.R., Eskenazi B. Exogenous shocks to the human sex ratio: the case of September 11, 2001 in New York City. *Hum Reprod.* 2006; 21: 3127–3131. <https://doi.org/10.1093/humrep/del283> PMID: 16936298
29. Bae J, Kim S, Schisterman EF, Boyd Barr D, Buck Louis GM. Maternal and paternal serum concentration of perfluoroalkyl and polyfluoroalkyl substances and the secondary sex ratio. *Anim Behav.* 2015; 83: 301–309. <https://doi.org/10.1016/j.anbehav.2011.10.031>
30. Jurewicz J, Radman M., Sobala W, Radman P, Jakubowski L, Wielgomas B, et al. Exposure to widespread environmental disrupting chemicals and human sperm sex ratio. *Environ Pollution* 2016; 213: 732–740. <https://doi.org/10.1016/j.envpol.2016.02.008> PMID: 27031570
31. Wang YX, Zeng Q, Sun Y, Yang P, Wang P, Li J, et al. Semen phthalate metabolites, semen quality parameters and serum reproductive hormones: A cross-sectional study in China. *Environ Pollution* 2016; 211: 173–182. <https://doi.org/10.1016/j.envpol.2015.12.052> PMID: 26766535

32. Pan Y, Jing J, Dong F, Yao Q, Zhang W, Zhang H, et al. Association between phthalates metabolites and biomarkers of reproductive function in 1066 Chinese men of reproductive age. *J Hazardous Materials* 2015; 300: 729–736. <https://doi.org/10.1016/j.jhazmat.2015.08.011> PMID: 26296076
33. Bae J, Kannan K, Buck Louis GM. Couples' urinary concentration of benzophenone-type ultraviolet filters and the secondary sex ratio. *Sci Tot Environ*. 2016a; 543: 28–36. <https://doi.org/10.1016/j.scitotenv.2015.11.019> PMID: 26575635
34. Bae J, Kim S, Chen Z, Eisenberg ML, Buck Louis GM. Human semen quality and the secondary sex ratio. *Asian J Androl*. 2016b; 18: 1–8. <https://doi.org/10.4103/1008-682X.173445> PMID: 26975484
35. Knez J. Endocrine-disrupting chemicals and male reproductive health. *Reprod BioMed*. Online 2013; 26: 440–448. <https://doi.org/10.1016/j.rbmo.2013.02.005> PMID: 23510680
36. Lea RJ, Byers AS, Summer RN, Rhind SM, Zhang Z, Freeman SL, et al. Environmental chemicals impact dog semen quality in vitro and may be associated with a temporal decline in sperm motility and increased cryptorchidism. *Science Reports* 2016; 6: 31281. <https://doi.org/10.1038/srep31281> PMID: 27503122
37. Ben Slima A, Chtourou Y, Barkallah M, Fetoui H, Boudawara T, Gdoura R. Endocrine disrupting potential and reproductive dysfunction in male mice exposed to deltamethrin. *Hum Exp Toxicol*. 2017; 36: 218–226. <https://doi.org/10.1177/0960327116646617> PMID: 27164926
38. Chang W-H, Li S-S, Wu M-H, Pan H-A, Lee C-C. Phthalates might interfere with testicular function by reducing testosterone and insulin-like factor 3 levels. *Hum Reprod*. 2015; 30: 2658–2670. <https://doi.org/10.1093/humrep/dev225> PMID: 26385792
39. Joensen UN, Frederiksen H, Jensen BM, Lauritsen PM, Olesen IA, Lassen TH, et al. Phthalate Excretion Pattern and Testicular Function: A Study of 881 Healthy Danish Men. *Environ Health Perspect*. 2012; 120(10): 1397–1403. <https://doi.org/10.1289/ehp.1205113> PMID: 22832070
40. Hond ED, Tournaye H, De Sutter P, Ombelet W, Baeyebys W, Covaci A et al. Human exposure to endocrine disrupting chemical and fertility: a case control study in male sub fertility patients. *Environmental Intern*. 2015; 84: 154–160. <https://doi.org/10.1016/j.envint.2015.07.017> PMID: 26292060
41. Nordkap L, Jensen TK, Lassen TH, Bang A.K, Joensen UN, Blomberg Jensen M, et al. Physiological stress and testicular function: a cross-sectional study of 1,215 Danish men. *Fertil Steril*. 2016; 105(1): 174–187. <https://doi.org/10.1016/j.fertnstert.2015.09.016> PMID: 26477499
42. Eberle M, Kappeler PM. Sex in the dark: determinants and consequences of mixed male mating tactics in *Microcebus murinus*, a small solitary nocturnal primate. *Behav Ecol Sociobiol*. 2004a; 57: 77–90. <https://doi.org/10.1007/s00265-004-0826-1>
43. Eberle M, Kappeler PM. Selected polyandry: female choice and inter-sexual conflict in a small nocturnal solitary primate (*Microcebus murinus*). *Behav Ecol Sociobiol*. 2004b; 57: 91–100. <https://doi.org/10.1007/s00265-004-0823-4>
44. Gomez D, Huchard E, Henry P-Y, Perret M. Mutual Mate Choice in a Female-Dominant and Sexually Monomorphic Primate. *Am J Phys Anthropol*. 2012; 147: 370–379. <https://doi.org/10.1002/ajpa.21653> PMID: 22213027
45. Craul M, Zimmermann E, Radespiel U. First experimental evidence for female mate choice in a nocturnal primate. *Primates* 2004; 45: 271–274. <https://doi.org/10.1007/s10329-004-0097-5> PMID: 15241637
46. Perret M. Influence of social factors on sex ratio at birth and on maternal investment in a prosimian primate. *Behav Ecol Sociobiol*. 1990; 27: 447–454. <https://doi.org/10.1007/BF00164072>
47. Perret M. Manipulation of sex ratio at birth by urinary cues in a prosimian primate. *Behav Ecol Sociobiol*. 1996; 38: 259–266. <https://doi.org/10.1007/s002650050241>
48. Perret M. Relationship between urinary oestrogens levels before conception and sex ratio at birth in a primate, the gray mouse lemur. *Hum Reprod*. 2005; 20(6): 1504–1510. <https://doi.org/10.1093/humrep/deh802> PMID: 15790612
49. Andrès M, Gachot-Neveu H, Perret M. Genetic determination of paternity in captive grey mouse lemurs: local sexual competition rather than sperm competition in a nocturnal prosimian? *Behaviour* 2001; 138: 1047–1063. <https://doi.org/10.1163/156853901753286560>
50. Andrès M, Solignac M, Perret M. Mating system in mouse lemurs: theories and facts using analysis of paternity. *Folia Primatol*. 2003; 74: 355–366. <https://doi.org/10.1159/000073319> PMID: 14605478
51. Perret M, Aujard F. Regulation by photoperiod of seasonal changes in body weight and reproductive function in the gray mouse lemur (*Microcebus murinus*): differential responses by sex. *Intern J Primatol*. 2001; 22(1): 5–24. <https://doi.org/10.1023/A:1026457813626>
52. Huchard E, Canale CI, LeGros C, Perret M, Henry PY. Convenience polyandry or convenience polygyny? Costly sex under female control in a promiscuous primate. *Proc R Soc London B* 2012; 279: 1371–1379. <https://doi.org/10.1098/rspb.2011.1326> PMID: 21976684

53. Le Tallec T, Théry M, Perret M. Melatonin concentrations and timing of seasonal reproduction in male mouse lemurs exposed to light pollution. *J Mammal*. 2016; 97:753–760. <http://dx.doi.org/10.1093/jmammal/gyw003>
54. Animal Behaviour. Guidelines for the treatment of animals in behavioural research and teaching. *Anim Behav*. 2012; 83: 301–309. <https://doi.org/10.1016/j.anbehav.2011.10.031>
55. Radespiel U, Lutermann H, Schmelting B, Brudford MW, Zimmermann E. Patterns and dynamics of sex-biased dispersal in a nocturnal primate, the grey mouse lemur, *Microcebus murinus*. *Anim Behav*. 2003; 64(4): 709–719. <https://doi.org/10.1006/anbe.2003.2121>
56. Johnson CN, Clinchy M, Taylor AC, Krebs CJ, Jarman PJ, Payne A et al. Adjustment of offspring sex ratios in relation to the availability of resources for philopatric offspring in the common brushtail possum. *Proc R Soc London B* 2001; 268(1480): 2001–2005. <https://doi.org/10.1098/rspb.2001.1723> PMID: 11571046
57. Radespiel U, Dal Secco V, Drogemuller C, Braune P, Labes E, Zimmermann E. Sexual selection, multiple mating and paternity in grey mouse lemurs, *Microcebus murinus*. *Anim Behav*. 2002; 63: 259–268. <https://doi.org/10.1006/anbe.2001.1924>
58. Perret M. Environmental and social determinants of sexual function in the male lesser mouse lemur (*Microcebus murinus*). *Folia Primatol*. 1992; 59: 1–25. <https://doi.org/10.1159/000156637> PMID: 1473776
59. Eberle M, Perret M, Kappeler P-M. Sperm competition and optimal timing of matings in *Microcebus murinus*. *Intern J Primatol*. 2007; 28: 1267–1278. doi:0.1007/s10764-007-9220-y
60. Majolo B, Lehmann J, de Bortoli Vizoli A, Schino G. Fitness-related benefits of dominance in primates. *Am J Phys Anthropol*. 2012; 147: 652–660. <https://doi.org/10.1002/ajpa.22031> PMID: 22331647
61. Cameron EZ. Facultative adjustment of mammalian sex ratios in support of the Trivers-Willard hypothesis: evidence for a mechanism. *Proc R Soc London B* 2004; 271: 1723–1728. <https://doi.org/10.1098/rspb.2004.2773> PMID: 15306293
62. Helle S, Helama S, Jokela J. Temperature-related birth sex ratio bias in historical Sami: warm years bring more sons. *Biol Letters* 2008; 4: 60–62. <https://doi.org/10.1098/rsbl.2007.0482> PMID: 18042510
63. Shargal D, Shore L, Roteri N, Terkel A, Zorovsky Y, Shemesh M et al. Fecal testosterone is elevated in high ranking female ibexes (*Capra nubiana*) and associated with increased aggression and a preponderance of male offspring. *Theriogenology* 2008; 69: 673–680. <https://doi.org/10.1016/j.theriogenology.2007.11.017> PMID: 18242683
64. Grant VJ, Irwin RJ. A simple model for adaptive variation in the sex ratio of mammalian offspring. *J Theor Biol*. 2009; 258: 38–42. <https://doi.org/10.1016/j.jtbi.2009.01.013> PMID: 19490877
65. James WH. Proximate causes of the variation of the human sex ratio. *Early Human Develop*. 2015; 91: 795–799. <https://doi.org/10.1016/j.earlhumdev.2015.10.004> PMID: 26549774
66. Setchell JM, Smith TE, Knapp LA. Androgens in a female primate: relationships with reproductive status, age, dominance rank, foetal sex and secondary sexual color. *Physiol Behav*. 2015; 147: 245–254. <https://doi.org/10.1016/j.physbeh.2015.04.051> PMID: 25936819
67. Monclús R, Blumstein DT. Litter sex composition affects life-history traits in yellow-bellied marmots. *Oecologia* 2012; 81 (1): 80–86. <https://doi.org/10.1111/j.1365-2656.2011.01888.x> PMID: 21801175
68. Dupont P, Pradel R, Lardy S, Allainé D, Cohas A. Litter sex composition influences dominance status of Alpine marmots (*Marmota marmota*). *Oecologia* 2015; 179, 756–763. <https://doi.org/10.1007/s00442-015-3375-6> PMID: 26169393
69. Lutermann H, Schmelting B, Radespiel U, Ehresmann P, Zimmermann E. The role of survival for the evolution of female philopatry in a solitary forager, the grey mouse lemur (*Microcebus murinus*). *Proc R Soc London B* 2006; 273: 2527–2533. <https://doi.org/10.1098/rspb.2006.3603> PMID: 16959645
